# Supplementary material for: Single cell transcriptional analysis reveals novel innate immune cell types
Source: PeerJ. 2014 Jun 24;2:e452. doi: 10.7717/peerj.452 (PMC4081288; doi:10.7717/peerj.452)
Supplement: File S5 [file peerj-02-452-s005.xlsx]

## Sheet: tcell_raw_ct
Label	chd 687958_A2	chd 740230_A4	chd 740230_A3	chd 740230_A6	chd 476653_D5	chd 476653_B1	chd 277060_D6	chd 476653_A3	chd 730195_G1	chd 476653_F5	chd 730195_A5	chd 476653_H4	chd 730195_D4	chd 476653_G6	chd 277060_H3	chd 687958_A4	chd 730195_D3	chd 687958_A5	chd 730195_F4	chd 687958_F1	chd 476653_F1	chd 740230_B1	chd 687958_B3	chd 277060_A5	chd 277060_B5	chd 277060_B3	chd 476653_D6	chd 740230_B4	chd 730195_H5	chd 687958_E6	chd134757_E4	chd 687958_D6	chd134757_B6	chd134757_D5	chd 730195_F2	chd 730195_B1	chd 277060_B6	chd 277060_E1	chd 730195_F3	chd 740230_E1	chd 277060_D5	chd134757_A4	chd 277060_H6	chd 476653_D1	chd134757_H5	chd 730195_E4	chd 740230_D2	chd 476653_G4	chd134757_D3
AKT3	19.7115	20.1166	18.442	19.83	22.6828	19.7431	19.3341	19.1471	20.7186	18.3747	17.5761	17.9265	21.816	19.233	16.8137	17.1457	18.5886	999	17.3636	18.0837	999	20.4982	999	18.2668	17.1669	999	999	18.8432	18.0828	17.2911	999	16.7031	19.0167	18.9741	17.7298	17.6046	18.332	18.2957	16.8273	20.0466	999	30.1415	35.4927	18.256	18.3413	22.94	19.532	19.841	17.2917
ATP2B1	999	999	999	999	18.6169	999	21.1072	999	999	999	999	999	999	999	999	999	999	999	19.2271	19.1214	999	999	999	21.4443	999	999	999	999	22.1554	999	999	999	999	999	999	999	20.7496	999	999	999	999	999	999	999	999	999	999	999	999
B3GAT1	999	19.4988	20.8486	999	999	999	999	999	999	999	999	999	999	999	34.0678	999	999	999	22.3106	999	999	20.5912	999	999	999	999	999	19.8125	999	36.8398	999	999	999	999	999	19.3967	999	999	999	22.8384	999	999	999	999	999	999	999	999	999
BCL2	999	24.6897	999	17.5063	35.9116	27.8456	999	34.2926	999	31.1665	999	32.3531	999	999	999	20.5732	29.6231	999	22.6612	29.5742	26.8886	22.7873	999	999	999	999	999	999	29.6529	999	29.3911	999	33.9295	28.8404	999	999	999	22.6004	999	17.9461	21.5037	999	999	999	999	30.8753	35.3994	999	999
CAMK4	20.7049	999	999	999	22.4177	999	999	999	23.349	999	999	22.2948	999	999	17.8675	999	999	999	18.9702	19.5229	999	22.5861	999	999	999	999	999	20.7055	999	999	999	999	19.1241	18.7271	999	999	999	999	18.1794	21.8106	999	999	999	19.646	20.8634	999	36.0779	20.8859	21.3532
CCR5	18.8048	999	999	20.2243	999	999	22.306	34.6131	19.3328	999	16.5063	22.3064	999	18.2459	16.613	17.3946	999	999	17.5561	18.342	999	19.2615	999	999	999	19.0842	999	22.1487	999	18.0103	999	18.0332	999	999	999	17.5433	18.9898	999	17.7693	999	19.3069	999	999	18.3913	23.0026	19.1349	20.3439	999	21.1229
CCR7	19.0247	999	999	18.3283	17.2128	19.2336	18.5164	18.3176	16.3424	19.9735	999	16.4582	999	18.6729	19.318	999	18.6013	16.3282	15.8167	15.1132	16.5554	17.516	16.5242	999	999	16.4565	19.0953	16.5837	17.0296	16.2718	999	17.2238	18.5691	16.1727	16.7229	16.1073	19.1499	999	15.9621	17.2366	999	999	35.2566	999	18.3783	999	16.2462	999	18.7596
CD27	18.5709	999	999	20.3714	17.9203	999	999	20.714	18.3741	999	17.6428	999	18.5297	999	18.7916	999	999	999	19.5041	18.3618	999	22.4811	20.4287	20.899	999	999	18.3149	19.6406	17.6103	17.4767	999	18.352	19.6751	999	21.2755	18.0804	999	17.2823	19.8635	22.2091	999	999	999	999	999	19.8873	18.2801	19.9814	22.0539
CD28	15.7659	999	999	999	17.8523	16.3684	17.9113	19.0501	16.4515	16.6682	17.7484	17.3764	17.723	18.5108	15.584	17.4454	999	18.5153	16.455	17.8884	17.5897	19.7022	18.3033	18.3396	18.2107	19.078	19.1836	18.3147	17.1838	16.758	999	16.2627	19.5348	17.509	20.3846	16.6131	999	19.876	16.9879	18.7465	18.1916	19.4108	999	20.6175	18.3785	17.7939	20.1548	21.0856	17.3531
CD3D	16.2771	19.867	18.5934	20.5327	19.2019	17.8574	17.0154	17.178	16.6683	17.6614	17.452	18.3729	17.5907	17.4957	16.0946	16.9151	23.8	17.171	17.943	16.5438	18.3527	18.7894	18.1289	18.4737	17.5133	18.1376	999	18.2458	17.1137	16.4079	17.439	16.4171	999	19.8087	16.0549	16.4438	999	17.3148	16.7485	18.626	18.5075	999	999	16.9872	999	17.8726	17.7404	16.8375	18.227
CD40LG	18.7873	999	999	19.3102	19.7618	19.2826	18.4419	20.2404	17.0629	17.7311	18.3447	19.1043	19.8193	999	17.3248	19.1262	999	999	999	999	999	999	999	999	19.6275	999	999	23.3958	999	999	999	18.7064	19.5238	999	999	20.132	23.0286	17.8581	19.4373	21.4516	999	21.7268	999	18.9877	17.6124	999	19.0045	19.3003	18.8266
CD4	19.7435	999	999	34.6811	999	32.8785	999	999	999	999	999	22.4844	20.9954	999	31.3379	999	999	999	20.9442	999	999	999	21.6296	999	999	999	999	999	37.337	24.2475	24.1917	999	999	999	999	999	999	19.9319	22.654	35.8048	21.3389	999	35.7935	999	999	999	28.99	999	999
CD8B	999	23.626	30.1999	25.7016	999	999	999	999	999	999	999	38.5273	21.0387	999	22.7186	28.0174	999	24.4484	999	22.2109	999	23.1479	999	30.3797	27.5697	22.1687	30.3968	999	999	21.0206	999	999	26.2516	999	999	23.2421	28.2708	999	32.2435	36.6979	26.2075	27.2061	999	999	999	999	28.2095	25.1353	33.5189
CDKN2A	999	999	999	999	999	999	999	999	999	999	999	999	999	999	999	999	999	999	999	999	999	999	999	999	999	999	999	999	999	999	999	999	999	999	999	999	999	999	999	999	999	999	999	999	999	999	999	999	999
CREB1	19.6493	23.7667	999	999	999	18.9224	19.0599	999	18.3078	19.1231	19.8556	999	18.6152	999	999	999	999	19.2546	999	19.7018	19.2431	999	20.0744	19.942	17.3754	19.5025	19.2701	999	20.2926	999	999	19.2306	19.4371	999	18.5415	19.8228	17.3315	20.0508	999	999	31.1134	19.0252	999	999	999	18.661	18.0292	18.4088	21.3746
CTLA4	16.6592	999	999	21.0768	999	999	20.7937	21.4307	999	999	18.8692	18.5452	17.5833	999	18.6462	20.4316	999	22.418	19.4813	18.3278	19.2142	999	18.3702	999	999	19.5353	999	22.516	999	999	999	999	18.7682	19.8221	999	17.1258	20.6731	999	23.5753	999	999	999	999	999	999	999	999	999	999
CXCR3	999	999	26.1873	22.7189	999	999	24.5141	999	999	999	21.4839	999	999	999	26.046	999	999	999	999	999	999	999	999	999	23.3934	999	999	999	999	999	999	999	21.818	999	999	999	999	999	28.6231	999	999	999	36.7651	999	999	999	23.4347	999	999
CXCR4	16.4985	18.3637	18.4198	18.1988	17.4027	17.0308	16.4883	17.7596	16.9845	16.868	15.325	15.9037	15.7826	19.9584	16.4851	16.1628	15.1557	16.9579	16.4324	16.7342	16.7922	17.9449	16.2494	17.7118	19.0099	16.1276	17.2097	17.0702	18.2748	16.5189	16.8575	17.0958	16.8006	20.0095	16.3912	17.2599	15.2752	16.595	15.8246	17.8069	16.6762	18.9874	25.3604	19.6048	18.5576	15.8975	17.7443	15.5278	17.466
CXCR6	17.5128	21.1705	29.0988	19.2258	35.7754	35.1405	21.5664	999	18.5205	26.2191	17.8961	31.6696	19.8063	27.597	19.12	999	999	19.2639	18.116	31.2149	27.0693	999	24.3622	999	19.7615	21.062	35.152	22.0061	19.7751	17.5704	21.1426	19.3619	19.989	999	999	18.817	999	999	18.733	999	17.1695	999	28.8299	999	21.1668	999	999	999	999
CXCR7	20.1228	36.0932	999	999	22.6222	999	19.5456	999	22.51	999	19.9914	999	999	20.6771	19.9551	20.0551	999	999	21.0768	22.3666	18.8994	999	999	999	999	999	999	20.5296	999	999	999	21.0279	20.4897	999	21.4635	999	999	999	19.829	999	999	999	999	19.0617	20.0325	999	999	999	999
DUOX1	999	999	999	999	999	999	999	999	999	999	999	999	999	999	35.26	999	999	999	999	31.5896	999	999	999	999	999	999	999	999	999	999	999	999	999	999	999	999	999	999	999	999	999	30.7337	999	999	999	999	999	999	999
DUSP2	999	999	999	999	999	999	999	999	999	999	999	999	999	999	999	999	999	999	19.8685	999	999	999	19.0598	999	35.8549	999	999	999	999	999	19.996	999	999	999	999	999	999	999	17.6618	999	999	999	999	999	999	999	999	18.271	999
DUSP3	999	999	999	999	999	999	999	999	999	999	999	999	999	999	999	999	999	999	999	999	999	999	999	999	999	999	999	999	999	999	999	999	999	999	999	19.7254	31.7139	999	999	999	999	999	999	999	999	999	999	999	999
FAS	999	999	999	35.3018	999	999	999	999	36.3148	22.081	999	32.5115	22.2597	999	999	999	999	999	999	999	30.3787	32.8058	999	999	999	999	999	999	999	999	999	999	999	999	22.2151	20.3177	999	999	999	999	999	29.3087	999	999	999	21.875	999	999	999
FASLG	19.3251	999	999	19.0201	999	20.0249	999	21.0721	22.6989	999	18.7748	999	18.6896	999	17.8156	17.5348	22.5578	999	999	18.1402	999	999	19.1407	999	19.1036	17.5827	999	19.8699	19.782	999	37.8188	19.6076	33.2674	18.977	999	18.6266	19.696	999	18.0715	20.9875	999	38.919	999	19.6157	999	999	22.5486	999	18.4633
FCAR	19.9027	999	999	19.0905	999	21.0826	19.8539	19.6177	999	22.1675	18.4462	999	20.9736	999	17.8722	19.0486	999	999	19.3525	22.0917	999	999	19.6656	24.273	19.0119	19.5174	24.1154	999	999	999	999	999	999	18.6635	999	19.1242	999	999	999	22.3572	22.1406	999	999	999	36.206	24.5653	999	18.4557	999
FYN	15.6558	15.6871	17.6374	18.2615	17.8499	18.8577	16.6857	17.9203	16.4454	18.3982	15.5987	16.9136	18.5071	16.7026	16.4956	18.1197	19.6934	19.1057	17.2173	17.2976	16.3638	18.8153	16.8611	18.537	16.3099	18.2893	18.8678	16.9924	15.8376	999	15.6824	16.1535	16.8753	18.7068	16.3945	16.16	19.497	18.8221	18.338	17.3913	18.1436	19.2787	22.9381	16.6802	17.6457	16.1212	18.9792	16.5207	17.8381
GLRX2	999	999	999	999	999	999	999	999	999	999	999	999	999	999	999	999	999	999	999	999	999	999	999	999	999	999	999	999	999	999	999	999	999	999	999	999	999	999	999	999	999	999	999	999	999	999	999	999	999
GZMB	20.5935	22.9296	21.095	22.0493	999	22.6409	999	999	22.9622	999	21.25	999	999	999	21.6961	22.5553	999	23.8506	999	25.0522	999	24.7502	21.9836	999	20.4062	999	21.9427	23.828	999	999	999	23.3435	999	22.0545	999	21.0198	999	21.6675	18.679	24.011	999	999	999	22.5562	19.8541	999	999	999	999
HIF1A	17.566	999	999	17.9377	22.4034	20.1596	19.1566	17.354	999	19.0006	17.11	19.5034	19.6304	999	16.9649	18.2128	18.2558	999	18.7999	19.0021	20.8063	18.323	18.4017	999	999	18.0548	19.3964	18.8711	19.454	22.9127	17.4403	16.6659	17.892	19.7981	17.4664	16.9447	18.8511	17.5604	17.4423	18.5542	19.1542	999	999	17.521	18.0211	19.2001	17.2997	999	17.6333
IFNGR1	20.4132	999	999	22.0342	19.8422	999	22.6892	21.3861	999	20.8111	999	999	23.5935	20.7825	17.7635	20.7466	21.1979	999	999	20.0704	999	999	19.5314	20.3759	19.7741	999	999	999	999	23.0464	999	999	999	999	999	18.7865	999	20.1187	19.1185	999	18.0443	999	999	19.9449	22.128	999	20.8476	21.2008	21.816
IL10	999	22.1494	18.711	37.7185	999	999	999	27.9387	999	999	999	38.2758	32.1182	27.8431	999	999	999	20.5538	999	22.0227	25.2734	23.7211	999	999	999	999	999	19.3285	28.3988	19.8654	22.9294	999	33.3784	999	999	999	999	999	999	36.9716	999	31.1164	999	37.3005	24.4249	37.5114	19.7015	37.3351	999
IL10RA	999	22.1077	35.437	18.8838	30.8501	31.7166	22.4727	21.8383	20.875	22.1167	24.8334	22.2417	22.4481	25.9743	20.34	22.4312	27.485	28.7728	34.9087	25.6017	33.9817	999	38.7526	999	22.1901	21.1248	22.2375	20.8065	999	22.1523	30.6853	999	21.0901	999	22.7845	23.4184	999	21.1012	25.176	19.5958	26.9635	28.9295	26.7095	21.073	26.8528	22.6193	28.3439	25.4743	29.4344
IL10RB	999	21.0019	999	20.2751	999	999	999	999	999	999	18.2563	999	999	999	20.8578	999	999	999	999	999	19.3136	20.9763	999	999	999	19.5081	999	999	999	999	17.8869	999	21.8969	18.9982	999	21.9347	999	999	999	21.5703	999	999	999	20.2843	999	999	19.8675	19.0568	21.8802
IL12RB2	999	999	999	999	999	999	999	999	999	999	999	999	999	999	999	999	999	999	999	999	999	999	999	999	999	999	999	999	999	999	999	999	999	999	999	999	999	999	999	999	999	999	999	999	999	999	999	999	999
IL17A	999	30.0223	34.9417	22.9586	999	999	999	29.9801	999	27.2355	999	34.254	999	999	999	999	999	31.8279	999	32.947	999	32.439	999	999	999	999	999	38.3852	999	999	30.5689	999	999	999	999	999	999	999	30.4366	22.7009	29.1572	27.8088	999	29.0015	999	999	33.4845	26.1368	999
IL18R1	19.4266	20.0035	24.0801	19.1179	24.1045	17.8391	21.6993	23.1332	18.4045	19.0087	17.7757	999	999	24.5208	17.7449	19.2352	999	999	999	17.8324	18.257	23.3275	19.1907	999	18.9068	999	24.1219	18.8712	20.2738	17.528	22.7482	19.1733	999	18.9242	20.6634	17.3738	999	999	20.1796	20.4228	18.8764	999	999	21.9083	17.8275	999	999	18.6509	19.1562
IL1R1	19.1581	18.6876	31.6701	18.5326	25.0479	18.8393	29.1394	18.3343	23.1016	35.6826	17.9739	38.9939	24.2897	25.987	17.7465	17.8818	24.453	17.8186	999	20.1451	32.4604	22.2156	18.2012	20.8764	21.2298	18.7357	23.9249	17.4753	21.7841	19.0865	22.8983	17.3646	33.9733	20.6022	36.4146	16.7819	19.0945	999	18.2781	999	22.4283	33.2631	30.4835	17.2278	18.9278	24.4783	33.1739	999	17.9015
IL2	19.1623	999	999	23.3445	19.5277	999	18.5432	999	999	999	18.1958	999	999	21.9208	19.7673	21.9353	999	19.1615	18.1632	999	999	999	999	999	999	999	999	21.7659	19.7329	999	999	17.0294	19.3824	999	999	19.4395	999	999	20.6299	999	999	999	999	999	18.8418	999	20.5716	999	21.6615
IL21R	999	18.8008	19.121	19.2616	19.3825	21.0394	999	999	19.2911	18.6406	999	999	19.8409	999	19.135	19.7779	999	18.5836	999	999	999	21.1282	999	999	999	19.0089	999	18.3218	999	20.1109	999	999	999	999	23.6155	999	999	19.212	19.1446	22.4811	999	36.0781	38.1759	999	999	999	17.7733	999	22.1165
IL2RB	18.3906	999	22.7482	999	999	19.2301	19.4444	28.0362	999	999	19.8396	999	999	999	20.6051	19.9102	999	999	999	999	999	999	999	999	999	999	999	999	999	19.5631	19.059	999	19.5938	999	999	19.6205	35.2495	999	29.3716	20.3639	999	999	999	24.8575	999	18.9625	999	19.3265	999
IL2RG	16.3663	17.7974	18.3079	18.4832	18.7423	19.272	17.8028	18.6551	17.068	17.6461	16.5792	16.1171	17.9248	18.2622	15.3754	19.3973	17.3596	999	16.9793	18.2435	18.3233	19.6861	18.1529	19.2997	16.8811	17.6628	999	18.2364	16.3899	18.7537	18.0133	17.9989	17.5118	999	17.6898	17.6291	18.541	19.1363	17.2342	18.3656	17.0487	19.6605	999	17.7932	999	16.8595	17.379	999	17.3827
IL4R	20.8586	999	999	19.9471	999	20.5117	18.9428	19.5774	17.7731	20.946	18.3838	999	19.9915	999	18.4925	19.6289	18.2522	19.7272	17.13	18.5782	20.5576	999	20.4057	999	22.2613	21.8882	18.8183	21.5356	20.3897	999	999	17.6495	19.7584	999	999	20.3066	17.4692	999	20.2925	20.0289	999	999	999	18.6152	19.0102	999	21.084	999	18.9937
IL6	999	999	999	999	999	999	999	999	999	999	999	999	999	999	999	999	999	999	999	999	999	999	999	999	999	999	999	999	999	999	999	999	999	999	999	999	999	999	999	999	999	999	999	999	999	999	999	999	999
IL7R	999	19.9336	999	19.0491	20.0106	16.5843	16.1961	17.2741	15.4209	17.5493	17.7813	16.2388	999	18.2343	14.0345	16.9219	999	16.9209	16.805	14.9073	16.124	19.1108	15.8314	16.5724	999	16.8492	999	19.6933	17.3084	17.0724	999	999	17.181	16.5962	15.5243	16.7637	999	17.2725	17.4066	17.6057	15.2675	18.0557	999	17.2332	17.1734	18.1169	15.8521	17.1928	15.1999
ITK	17.6237	22.0746	999	19.8215	18.2631	18.738	18.3946	18.2243	18.4826	19.1462	18.0542	18.218	18.2587	18.8633	16.9753	19.4603	999	19.8579	17.0759	17.4062	16.7479	21.3645	16.5579	18.9324	17.7324	19.6985	19.144	20.2979	19.4806	17.5144	21.1717	18.5455	18.168	17.9259	17.9886	17.5998	999	18.7665	16.7714	19.9305	18.295	19.0286	23.9309	19.1927	19.0634	18.9868	19.1049	18.6997	17.325
JAK1	21.1866	21.7842	23.7287	20.9231	22.6457	999	18.9436	999	20.0871	19.431	37.5931	20.0443	20.6214	999	20.0771	22.0618	21.7196	19.1857	20.088	20.0502	36.4137	23.8502	19.8346	24.5847	19.1137	33.9592	22.4001	20.8376	19.8594	20.9303	20.9313	19.847	21.2258	999	23.1473	23.007	20.0303	999	20.8061	20.5247	18.6011	33.4025	30.4098	18.2231	24.4987	20.4368	20.8934	20.6015	20.6036
JAK3	24.7769	19.4143	19.0803	20.7732	20.6135	21.4615	999	999	999	23.4523	999	22.2484	999	999	22.9116	999	21.5693	19.203	36.5688	20.0274	999	19.2421	21.3459	999	999	999	999	24.2997	999	23.0167	23.6869	999	18.2057	18.3596	22.2426	23.9466	999	23.3074	20.3422	22.6695	999	999	999	22.0581	28.4586	20.1027	18.3685	999	25.0392
KLRC1	999	999	999	999	999	999	999	999	999	999	999	999	999	999	18.2667	18.405	999	26.2411	999	999	999	999	999	999	999	999	999	999	999	999	33.3649	999	21.3349	31.09	999	999	999	999	999	999	999	999	999	999	999	999	999	999	21.9634
LAG3	999	999	999	999	999	999	999	999	999	999	999	999	999	999	34.6498	999	999	999	999	999	999	999	999	21.0765	999	999	999	999	999	999	999	999	999	999	999	21.1232	999	999	999	999	999	999	999	999	999	999	23.6791	999	999
LAT	25.7363	37.7151	34.5135	25.6197	999	999	23.3556	23.4868	999	999	999	999	999	999	19.778	999	999	22.4553	999	24.3515	999	999	999	33.347	999	999	18.8908	38.6842	23.7586	999	999	24.8214	37.1169	33.641	999	999	999	999	999	999	22.6561	999	999	999	999	999	27.6462	23.5584	28.0997
LCK	999	18.6698	999	22.0858	19.941	19.0719	999	23.0099	999	999	999	999	999	999	17.9609	20.8877	999	19.4106	999	999	999	20.9748	999	19.9005	20.356	18.5553	999	21.8631	999	999	21.7784	999	20.3584	20.0864	999	20.9152	999	999	19.6593	20.8253	999	999	999	19.7865	999	999	21.7085	999	20.6336
LTA	22.0627	999	999	20.1229	999	999	20.5106	999	999	999	18.0786	999	18.3713	999	999	999	999	999	18.8399	999	999	999	999	999	999	18.5493	999	999	20.7132	999	999	999	999	999	18.9569	20.065	999	999	17.3932	999	21.6698	999	999	999	18.6758	999	21.7557	999	19.3534
MAP3K5	19.141	999	999	999	999	999	999	999	999	999	999	999	999	999	32.5919	999	999	999	999	999	999	999	999	999	999	999	999	999	999	999	999	999	22.531	999	999	999	999	999	999	22.1271	999	999	999	999	999	999	999	20.1279	21.0897
MAPK1	20.5855	20.5987	19.2861	999	999	18.8112	19.5593	999	18.434	999	19.1801	999	20.7212	999	18.2819	21.0807	19.5171	19.3933	999	999	999	20.581	999	999	999	999	999	999	999	999	19.1228	18.9402	999	20.0721	19.3857	18.1392	21.1778	999	21.0727	20.7984	999	999	999	17.8761	999	19.6297	21.9749	18.9991	19.9958
MAPK9	999	19.8035	30.3397	24.1954	999	28.9375	999	38.3406	999	18.9851	999	19.2702	999	999	28.7586	38.1236	999	999	999	999	30.5882	27.18	21.5516	999	999	31.5798	38.0728	999	26.5443	31.9907	999	999	29.9801	35.859	38.1217	19.2852	999	999	999	23.3987	999	28.2511	999	31.1872	999	999	19.2647	26.8404	999
MPO	31.0769	25.6199	25.3985	20.558	24.6046	26.3595	26.8288	25.6773	27.2138	26.2298	24.0562	23.8054	25.7627	29.0032	25.0777	27.3674	26.6498	26.0413	27.3913	26.0128	26.7447	25.0821	25.9493	32.0802	24.3074	25.8941	25.0448	25.1213	26.4307	29.8752	23.0419	29.9586	25.5675	26.0868	25.6152	23.5137	29.9609	26.6054	28.2778	28.5612	32.0787	28.247	27.3208	26.2857	27.1539	25.087	26.7456	27.0026	25.1592
NFE2L2	20.5595	19.2114	19.6788	19.9275	18.4026	19.6243	999	19.8163	20.0934	999	18.346	18.7406	18.0119	19.2701	20.7085	18.9185	17.2748	18.2893	999	19.9322	999	999	26.9708	999	999	999	999	18.4093	999	999	19.2613	999	19.9895	18.6267	999	999	19.5273	999	17.9613	999	18.3453	999	999	19.5765	999	999	17.9311	19.0851	17.9241
NPAT	19.3405	999	999	999	18.621	18.1651	18.5747	22.2992	18.4346	22.1085	17.3933	18.9622	20.1733	17.9331	17.7222	18.9786	999	18.4507	18.7544	18.5244	20.0715	19.6314	999	19.0081	19.3681	19.8668	999	20.4404	21.0311	18.1458	18.7843	17.2366	21.2641	999	18.9976	19.2358	999	18.8332	19.6596	22.7511	19.7765	21.4953	37.6615	18.2784	18.9564	22.1653	20.7305	19.0975	18.4712
NRAS	18.713	19.539	19.7249	999	999	19.2423	999	999	999	999	18.043	999	18.3104	999	999	999	19.1669	999	22.0276	999	999	999	18.9436	999	999	999	999	999	999	999	999	999	19.274	999	999	999	999	18.7338	999	20.4151	999	999	999	36.9812	999	21.2965	999	999	999
ORAI1	999	25.2934	29.3673	24.8626	999	999	34.0775	999	999	999	33.2309	999	25.474	999	26.7687	999	28.563	999	25.2457	33.621	25.78	33.2996	999	33.0928	28.7759	24.875	999	23.7171	26.8308	29.2193	999	999	34.1207	999	26.837	999	32.4599	26.9342	999	33.2149	25.0471	35.7847	24.6339	28.5343	25.94	25.0313	38.4936	25.5005	26.5785
PIK3CD	21.4365	21.65	999	22.2579	18.9167	999	999	19.8713	19.3537	999	21.3426	999	999	19.8485	20.8315	999	22.1634	20.08	18.5905	20.3925	18.1656	22.2802	18.1564	999	999	19.0108	999	999	21.036	999	21.0186	999	19.9338	19.3561	20.7371	19.8882	19.1034	999	21.0736	22.168	999	999	999	19.2144	999	999	22.8708	19.5208	23.4078
PLCG1	999	999	999	999	999	999	999	999	20.2172	999	999	999	999	999	19.1771	999	999	999	19.2141	18.2888	999	23.5085	20.8517	999	19.2363	20.3043	999	999	19.7458	21.5477	18.8657	999	19.7612	999	999	999	999	18.826	19.0515	999	19.5707	999	999	999	999	999	999	999	999
Prf1	999	18.9872	19.8227	999	999	999	999	23.4106	999	19.6106	19.2739	999	21.528	21.2627	18.8131	19.4566	999	20.5973	999	19.7647	999	999	999	999	17.8449	999	999	999	999	999	19.1412	999	999	999	999	999	999	32.0565	22.1023	999	18.6058	999	999	999	999	18.3446	21.2274	20.2648	22.2909
PRKCQ	19.6812	17.8982	17.2877	20.059	999	20.2328	18.5054	17.7295	22.2934	21.9088	16.7665	21.3378	19.594	999	16.7881	17.1136	16.8004	17.9521	18.423	20.0086	16.5209	18.316	17.5604	999	16.701	19.3035	17.9012	19.2102	17.5315	999	21.9568	16.9811	17.9793	18.1357	17.8573	17.0104	18.5101	18.5781	20.4303	999	20.4459	999	999	999	24.0158	20.7662	17.9929	18.8282	999
PTPN11	999	999	999	999	20.3925	999	22.1345	999	22.0497	999	19.4064	999	999	999	21.5753	999	999	21.9973	20.4909	999	999	999	21.8937	999	20.4002	999	999	999	20.8968	18.6114	999	19.1764	999	30.1038	19.3724	999	21.9183	20.1449	24.7561	999	19.7362	34.9114	35.1436	999	22.0499	31.3511	21.9064	20.4584	20.0831
PTPN1	999	999	999	999	999	999	999	999	999	999	999	999	999	999	999	999	999	999	999	999	999	999	999	999	999	999	999	999	999	999	999	999	999	999	999	999	999	999	999	999	999	999	999	999	999	999	999	999	999
PTPN22	17.3491	17.2747	17.8001	18.6649	19.2121	999	21.743	18.6727	18.0626	999	17.5929	17.3902	19.1729	18.899	17.2347	17.5545	19.2487	16.6408	19.4729	16.6457	21.9936	18.6571	18.0202	23.7035	18.2154	18.7804	999	19.1771	21.9045	16.581	18.9678	16.8197	18.3365	18.2848	20.8788	19.3134	23.3428	20.6781	21.9465	17.876	19.1455	19.6741	999	18.917	18.286	17.756	17.4263	20.7633	19.9957
PTPN6	18.6993	22.8282	18.5309	22.9417	30.6246	19.0252	999	999	16.879	19.1486	17.0164	17.9449	18.4339	18.8111	17.7137	999	17.8885	19.6299	20.0855	18.67	18.3999	19.2789	19.0775	19.2201	999	22.1497	18.5169	999	16.9528	18.4538	17.5878	999	18.4471	19.5226	18.1321	999	19.4596	999	999	19.426	999	19.9088	999	18.5389	999	999	21.1452	999	999
RAC2	15.6353	17.2767	17.4384	18.2786	17.8376	16.9408	15.577	17.6493	15.8196	17.0524	16.6808	17.4376	16.9426	19.7065	15.8911	18.3209	17.1436	17.3397	17.5602	17.9265	17.7327	17.228	17.0061	17.7818	15.5892	17.9068	22.2541	16.8642	17.1856	16.3002	19.0558	17.4292	17.6693	17.4164	16.5525	15.7913	18.3259	15.4415	17.1283	17.3966	16.8403	19.6843	29.6684	18.2929	20.8265	19.3802	16.2911	17.0688	17.5946
RPP38	999	21.1778	20.1225	20.1841	26.9084	35.1415	25.0621	999	23.5076	29.6428	29.1327	26.0055	999	22.7201	31.5925	25.962	999	22.2078	28.6985	999	21.8933	22.0862	34.9888	30.6854	30.5723	30.0691	23.0443	27.2941	22.8566	28.5402	28.5601	22.5932	31.7743	999	25.8447	30.9897	20.9461	36.3625	29.6114	20.3177	21.2285	999	22.9129	27.9276	28.3504	999	20.7273	37.8987	25.8445
SH2D1A	18.0004	18.5371	19.9771	35.2373	999	27.686	999	18.7407	999	999	19.4143	26.8713	999	19.5817	18.2932	18.0333	999	18.9338	19.2892	999	20.0636	999	26.7731	999	999	19.4752	26.6745	19.7625	20.5219	19.2383	18.9129	22.0491	18.9501	18.5783	999	18.1594	999	18.7804	19.0117	21.9543	19.6585	999	27.2546	19.361	999	999	19.3054	999	33.2423
SOD2	18.2319	23.9138	20.9641	20.0975	21.1146	18.5253	18.5811	20.118	18.1869	999	19.5233	999	19.4335	22.6693	18.2429	20.2518	999	18.6129	20.1278	19.2525	19.2317	20.3578	17.8847	19.0136	22.3254	18.1329	999	20.7483	22.5786	19.4018	999	18.181	20.4088	18.0347	19.8462	18.5561	19.1169	999	999	18.7325	18.8398	999	999	999	22.0686	999	19.0534	17.6646	18.1721
SOS2	999	999	22.2466	999	999	999	999	999	21.4143	999	20.9289	20.4627	999	999	20.0392	999	999	35.0125	999	999	999	999	21.5176	999	22.8217	999	999	20.8455	35.2018	999	999	999	22.1664	999	999	999	999	999	999	37.5146	999	999	999	999	999	21.0758	37.5726	999	22.2582
STAT3	19.8686	20.561	20.1001	18.8834	18.8631	20.1567	18.3715	21.3299	999	19.9203	19.8368	18.9214	999	999	17.8211	20.5676	999	999	18.2911	18.7115	999	19.3803	17.8644	21.2812	20.1479	19.6711	999	999	20.2845	999	19.3886	999	18.7682	999	20.4545	999	19.9567	19.7871	18.2901	20.4829	19.2896	999	999	999	999	18.1013	18.6798	19.0858	19.0888
STAT5a	19.6024	999	999	999	999	999	999	999	999	999	999	999	18.0675	999	19.3793	18.8663	999	999	999	999	999	999	18.3263	999	999	999	999	999	18.9864	21.8976	999	999	999	999	999	18.4876	999	999	999	20.0869	19.6683	999	27.5631	37.7893	999	999	999	19.5933	20.3733
STAT5b	18.3094	999	30.7103	37.9175	18.7388	29.7318	18.2384	19.2121	16.7653	18.4703	16.7608	20.2494	30.1197	18.5664	17.7408	21.4148	31.9383	19.0606	21.8274	19.5561	19.0671	20.7405	18.4403	999	29.681	19.5869	20.2729	20.2545	19.109	18.1359	18.6206	17.7444	18.8494	18.4819	17.3902	18.5987	32.8588	30.8193	29.201	19.3474	999	28.0653	999	19.0749	999	26.6929	19.5679	17.9884	18.4189
STAT6	19.1482	19.9949	22.54	35.5059	38.1908	999	17.8057	17.8827	17.873	999	31.7372	19.9084	999	999	999	999	24.2701	20.4281	19.4894	18.1532	999	20.5674	18.4429	999	18.4905	19.0978	999	21.5468	19.2104	19.5145	33.8397	19.5162	34.8236	18.946	19.4207	27.7598	19.9553	19.624	17.7268	20.4143	19.4006	999	999	18.83	29.1711	26.1197	19.3454	29.267	999
STIM1	20.6431	19.4415	999	999	19.5989	999	19.4184	18.4767	999	22.2164	999	999	18.4671	999	19.3057	999	19.8215	999	19.4863	16.3899	999	999	18.8108	999	18.5085	999	999	999	999	19.2359	18.3452	19.0879	999	18.9885	999	999	19.3342	999	20.2465	999	18.2751	999	38.6846	999	20.2857	999	19.3211	21.9721	18.6884
TCRG	999	999	16.6644	999	22.1776	999	999	999	999	999	999	19.5054	999	999	16.2237	15.8053	999	999	19.5845	999	999	999	999	18.5798	19.2033	999	999	17.6389	999	999	999	999	999	999	999	999	24.2892	999	999	999	999	999	999	999	21.4096	999	999	999	999
TERF1	16.0271	19.6546	22.3861	17.0196	22.2067	999	17.3593	18.0225	17.2036	999	15.4787	17.9305	20.8166	16.8924	15.7704	16.6996	18.7999	16.4497	15.5782	16.4257	21.464	21.7987	15.8018	18.9401	16.7092	16.9732	999	17.9904	16.647	18.8822	999	17.8592	17.1557	22.3764	19.095	15.3427	18.3878	999	16.2449	20.6736	20.9009	999	999	17.8011	15.9143	18.8203	19.6872	18.8046	16.5246
TGFB1	20.3315	35.9985	22.2905	33.8784	23.561	19.409	19.9415	999	20.7103	20.1858	23.8114	999	21.0025	999	17.9917	21.8212	22.5759	999	21.0754	35.7636	21.6209	36.1725	999	19.9028	20.558	22.4427	21.501	999	22.5203	999	999	999	999	999	20.4116	20.9567	999	20.4674	999	36.5824	18.8677	999	23.68	22.7329	999	22.4881	22.1431	22.7357	23.731
TGFBR2	17.0538	18.7907	19.945	17.8928	17.314	20.8696	19.1016	17.185	16.6144	19.8245	18.4043	17.9752	17.7559	19.3643	16.0817	16.9856	20.0755	16.8024	16.1284	16.5598	17.1283	18.9689	15.8033	22.4022	18.9589	16.3695	999	18.9626	16.4	16.5893	17.7149	17.5485	16.8706	17.3036	17.0674	17.3152	16.5291	18.4096	17.0236	17.3257	17.7358	19.4683	999	20.9831	18.6875	17.5608	17.0426	20.0064	17.3668
TLR4	20.8236	999	999	18.6569	999	19.3583	18.0016	999	999	999	17.4745	999	22.4076	999	17.8338	17.8133	22.259	18.6048	18.0839	999	18.552	999	999	19.6527	999	999	999	22.5937	999	999	999	999	999	20.3277	999	19.0071	999	999	22.7216	999	999	999	999	999	20.3222	999	20.8351	19.8434	999
TLR5	999	999	999	999	999	999	999	999	999	999	999	999	999	999	999	999	999	999	999	999	999	999	999	999	999	999	999	999	999	999	999	999	999	999	999	999	999	999	999	999	999	999	999	999	999	999	999	999	999
TLR7	19.3557	999	999	999	999	999	999	999	999	999	18.9094	999	999	999	16.9536	999	999	999	999	999	999	19.2897	19.2785	999	999	999	999	999	999	999	999	17.5822	999	17.8151	999	17.9327	999	999	20.3683	999	18.9761	999	999	32.6534	18.2956	999	19.186	999	19.1091
TNF	20.2434	999	999	21.1764	999	999	19.4456	999	999	24.0248	19.6383	999	999	999	20.6264	999	999	999	19.0895	999	999	999	999	22.9209	999	22.7004	999	999	999	999	999	999	999	19.9967	18.8676	20.6925	999	999	19.888	999	999	999	999	999	999	999	999	20.3529	20.9642
TNFRSF8	999	999	999	23.2018	999	999	999	999	999	999	999	23.9179	999	999	27.2873	27.9874	29.3826	999	27.7244	30.5706	999	26.7416	37.3933	999	999	999	38.6383	999	999	30.2507	999	999	999	29.0979	999	999	999	999	999	29.7058	999	37.3245	999	999	999	999	25.2024	999	34.6834
TNFRSF9	999	32.4744	31.6656	32.8818	35.7434	34.5855	27.9307	32.9318	24.1251	999	31.8259	34.8198	999	37.5486	20.9871	36.8226	32.4336	36.1084	33.2486	32.3866	33.3389	999	38.5586	999	33.8482	29.5686	36.8649	21.3266	31.5709	33.3599	33.5945	33.4611	33.4972	34.4303	31.3946	21.3104	35.7633	36.0554	36.9976	33.5703	34.9593	35.4695	35.676	31.3104	999	35.9242	29.7252	999	28.1743
TRAF6	999	999	19.3789	18.0886	37.5769	999	18.5762	999	18.9213	18.2771	19.0329	999	19.5113	999	19.091	999	999	999	20.0907	19.308	19.4114	999	999	999	22.0475	18.9815	999	999	17.9147	999	999	999	999	999	19.4104	18.1414	999	999	17.404	999	19.3398	999	999	999	999	20.0199	999	19.7321	999
TXN2	999	999	999	32.1237	999	999	999	28.5516	999	999	999	999	999	999	31.121	999	999	999	23.2756	999	36.3489	999	22.3095	999	26.3538	31.0598	999	33.6038	20.0611	999	999	33.9128	999	999	35.0985	999	37.9469	999	999	28.6371	999	999	27.2194	999	999	999	999	999	26.8731
VAV1	18.5789	18.4603	999	20.6503	21.115	999	18.8972	18.9286	17.8246	19.6069	999	19.6888	19.2643	19.5922	18.2661	999	20.3123	999	999	18.9031	999	22.3387	999	19.3364	999	21.8703	19.4412	19.6369	999	19.9398	23.7504	999	999	20.4481	999	999	999	999	19.5404	999	18.2439	999	999	19.5455	19.9481	999	999	999	999
WNT3	999	999	24.4151	19.9073	24.4965	999	999	19.3018	999	999	999	999	999	21.1649	999	999	999	999	19.8499	999	24.418	999	999	999	999	20.9167	22.6776	21.0329	19.41	999	999	24.4836	999	20.7095	999	999	999	999	999	999	999	999	999	999	999	999	999	999	20.7861
ZAP70	17.4278	18.2658	19.6601	20.2284	999	19.825	17.5978	19.2819	18.1553	19.8574	17.202	20.8871	18.9198	999	19.8083	18.3199	23.7808	17.7416	18.0406	17.7487	20.4541	21.1687	17.6141	21.9339	17.8341	999	19.1156	20.052	20.1527	18.1111	17.7553	20.8155	17.7008	18.9736	18.479	17.7348	999	18.2532	19.6584	999	18.7284	999	999	999	20.181	999	22.7062	19.4089	18.7227
[truncated: 202 more columns]
